# Supplementary material for: Are sodiation/de-sodiation reactions reversible in two-dimensional metallic NbSe2?
Source: Royal Society of Chemistry journal article supplement (doi:10.1039/d4ee00143e), 2024-01-01
Supplement: d4ee00143e1.pdf [file d4ee00143e1.pdf]

## Supporting Information for

### Are Sodiation/De-Sodiation Reactions Reversible in Two-Dimensional Metallic NbSe<sub>2</sub>?

Zaichun Liu, Rui Wang, Panpan Zhang, Chaochao Dun, Jeffrey J. Urban, Sheng Yang, Tao Wang, Yuan Ma, Yiren Zhong, Jiarui He, Zhi Zhu, Xiaosong Xiong, Weijia Fan, Qi Zhou, Haoyuan Yang, Xin-Bing Cheng, Faxing Wang\*, Ying Huang\*, and Yuping Wu\*

\*Corresponding authors: F. Wang, Y. Huang, and Y. Wu

**E-mail:** wuyp@seu.edu.cn (Y.W.), yinghuang215@hotmail.com (Y.H.), faxing.wang@seu.edu.cn (F.W.)

**This PDF file includes:**

Figs. S1 to S9

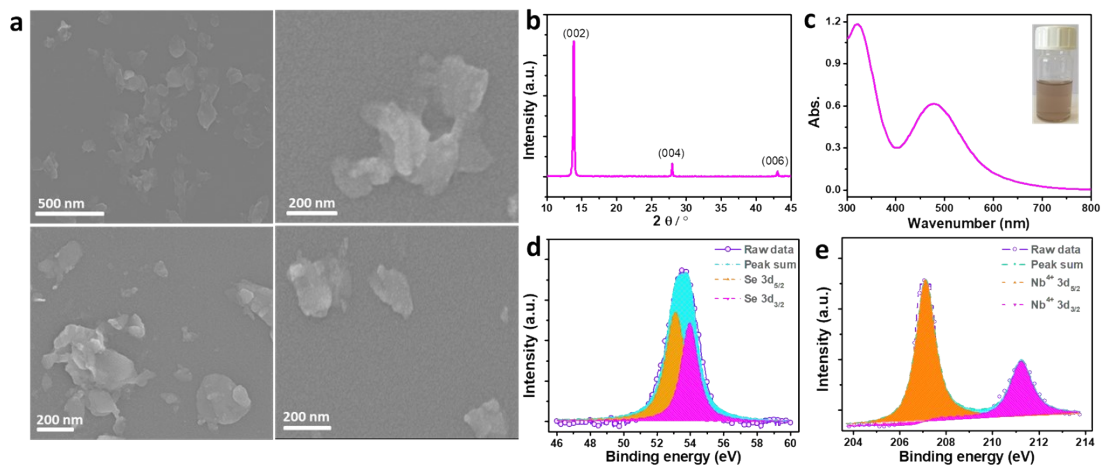

**Fig. S1** (a) SEM images of exfoliated NbSe<sub>2</sub> samples with different magnifications. (b) XRD pattern of exfoliated NbSe<sub>2</sub> samples. (c) UV absorbance spectrum of exfoliated NbSe<sub>2</sub> samples. The insert is a photograph of typically NbSe<sub>2</sub> flake dispersion. XPS spectra of (d) Se 3d and (e) Nb 3d peaks from NbSe<sub>2</sub> flakes. The Se species can be fitted with Se 3d<sub>5/2</sub> (53.2 eV) and Se 3d<sub>3/2</sub> (54.1 eV) peaks in agreement with the Se<sup>2+</sup> state. The two peaks at 203.0 and 206.5 eV correspond to the Nb<sup>4+</sup> state.

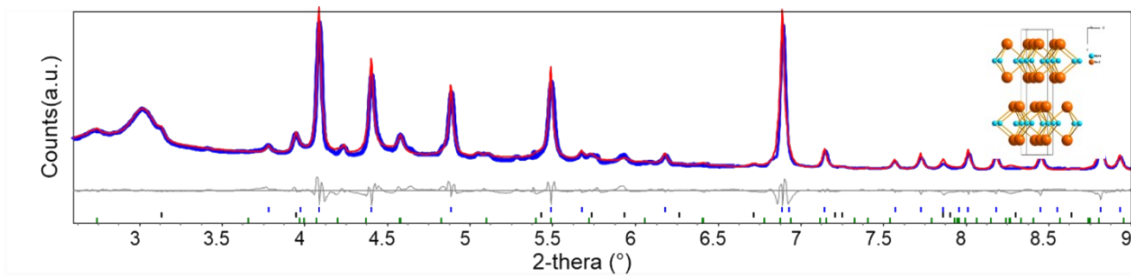

**Fig. S2** Synchrotron XRD patterns of NbSe<sub>2</sub> flakes and Rietveld analysis.

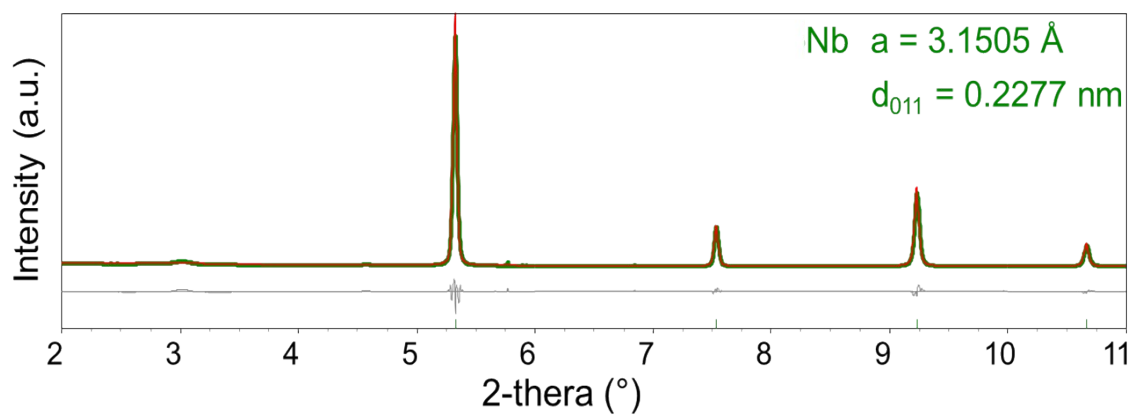

Fig. S3 Synchrotron XRD patterns of Nb metal reference and Rietveld analysis.

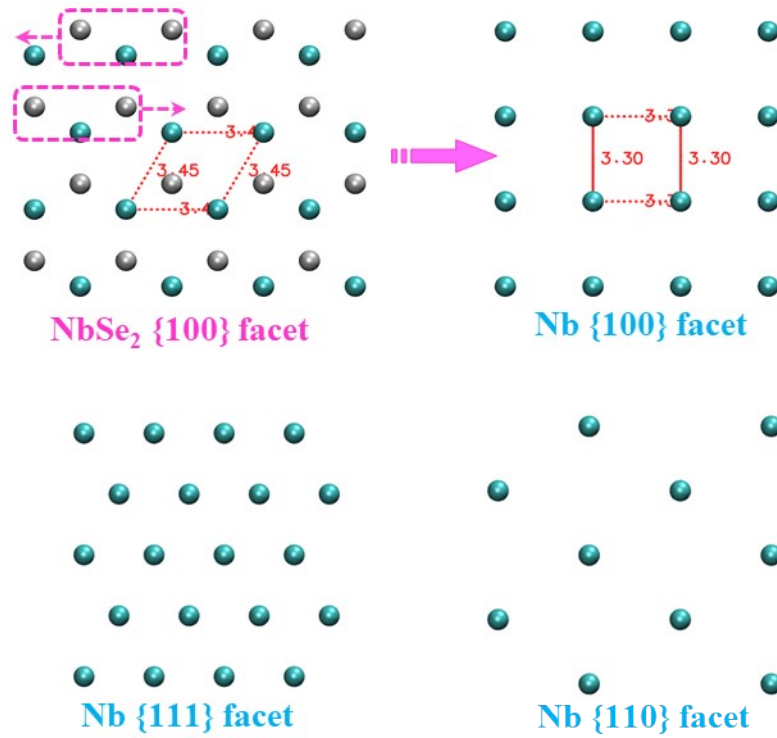

**Fig. S4** Schematic illustration of the topotactic conversion reaction and lattice models of Nb atoms in the crystal structures of NbSe<sub>2</sub> (4 × 4 supercells with 48 atoms) and *bcc* Nb (4 × 4 supercells with 16 atoms in the surface layer). The grey and blue spheres represent Se and Nb atoms, respectively.

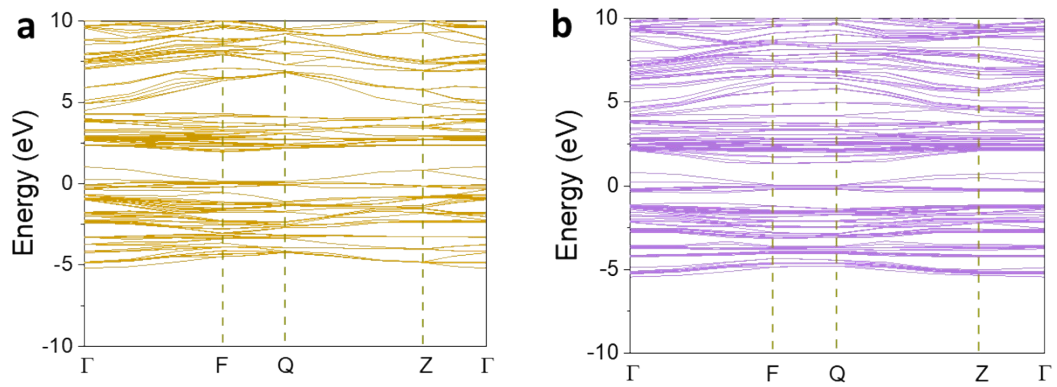

**Fig. S5** Band structures of (a)  $\text{NbSe}_2$  and (b)  $\text{Na}_x\text{NbSe}_2$ .

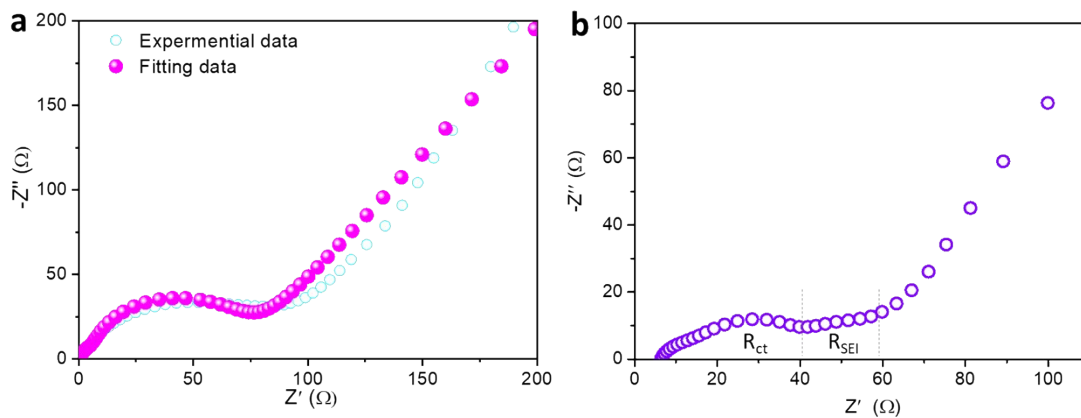

**Fig. S6** Electrochemical impedance spectroscopy (EIS) of (a) pristine NbSe<sub>2</sub> electrodes and (b) NbSe<sub>2</sub> electrode after 240 cycles.

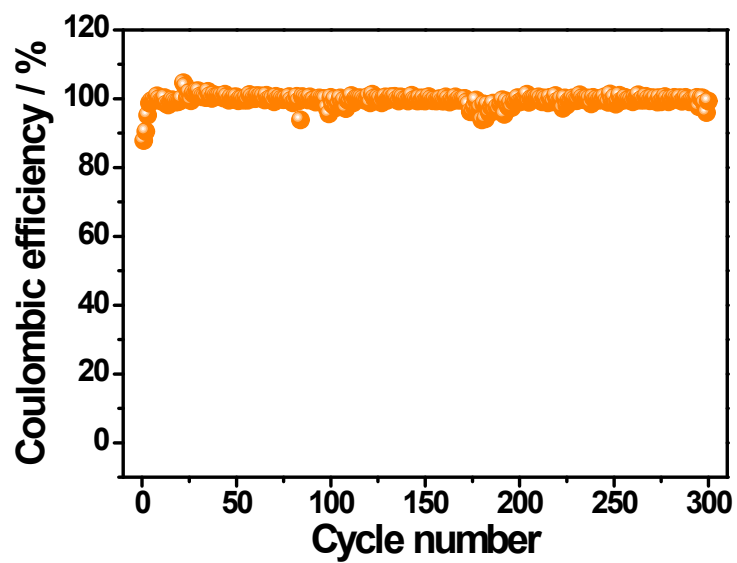

**Fig. S7** The Coulombic efficiency of the assembled dual-ion battery based on activated NbSe<sub>2</sub> anode and graphite cathode.



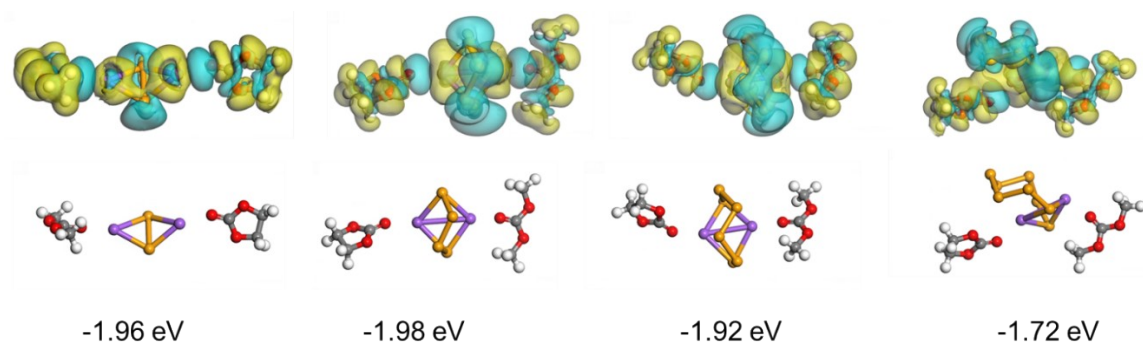

**Fig. S8** The calculated dissolution energy of intermediate  $\text{Na}_2\text{Se}_x$  species in the used electrolyte solvents.

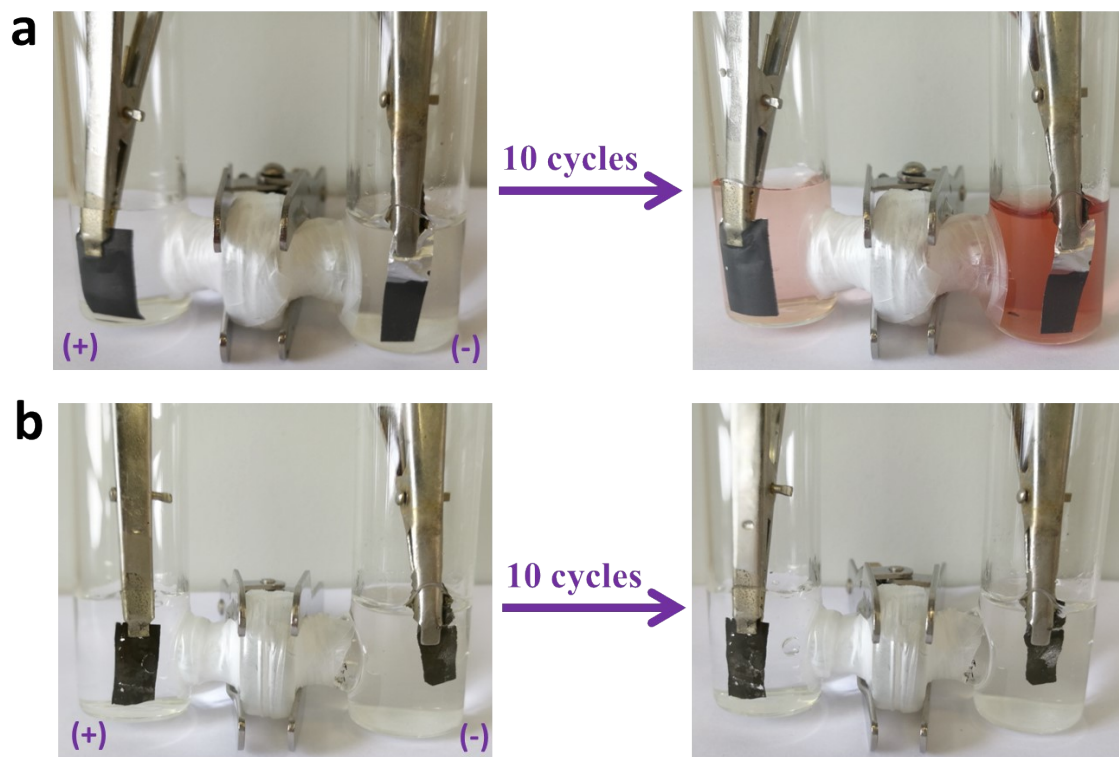

**Fig. S9** Photographs of the dual-ion battery using (a) pure Se and (b) Nb/Se (activated  $\text{NbSe}_2$ ) anodes in a two-electrode glass cell device. To understand the inhibition effect of polyselenides, two-electrode glass battery device was assembled to observe the dissolution behavior during charge/discharge process.

**Table S1.** Main electrochemical performance parameters of NbSe<sub>2</sub> based electrodes in half-cell tests.

| Electrodes                                  | Stored metal ion | Maximum reversible capacity / mAh g <sup>-1</sup> | Cycle/capacity retention | Ref.      |
|---------------------------------------------|------------------|---------------------------------------------------|--------------------------|-----------|
| NbSe <sub>2</sub> nanosheets                | Li-ion           | 347                                               | -                        | 1         |
| NbSe <sub>2</sub> nanoparticles             | Li-ion           | 313                                               | -                        | 2         |
|                                             | Mg-ion           | 101                                               | 42% after 40 cycles      |           |
| NbSe <sub>2</sub> flakes                    | K-ion            | 115                                               | 91% after 40 cycles      | 3         |
| NbSe <sub>2</sub> flakes                    | Na-ion           | ~125                                              | 84% after 100 cycles     | 4         |
| NbSe <sub>2</sub> nanoparticles             | Na-ion           | 154                                               | 94% after 100 cycles     | 5         |
|                                             | Li-ion           | 485                                               | 83% after 100 cycles     |           |
| NbSe <sub>2</sub> / N,Se co-doped CNFs      | K-ion            | 288                                               | ~100% after 1200 cycles  | 6         |
| NbSe <sub>2</sub> @graphene                 | Li-ion           | 489                                               | >100% after 1000 cycles  | 7         |
| Flower-like Nb <sub>2</sub> Se <sub>9</sub> | Li-ion           | 672                                               | 88% after 250 cycles     | 8         |
|                                             | Na-ion           | 342                                               | 52% after 250 cycles     |           |
| NbSe <sub>2</sub> /SnSe                     | K-ion            | ~375                                              | ~75% after 1000 cycles   | 9         |
| NbSe <sub>2</sub> /NbS <sub>2</sub>         | Na-ion           | ~200                                              | 92% after 500 cycles     | 10        |
| NbSe <sub>2</sub> flakes                    | Na-ion           | 212                                               | 72% after 500 cycles     | This work |

## References

1. E. Hitz, J. Wan, A. Patel, Y. Xu, L. Meshi, J. Dai, Y. Chen, A. Lu, A. V. Davydov and L. Hu, *ACS Appl. Mater. Interfaces*, 2016, **8**, 11390–11395.
2. C. Peng, H. Lyu, L. Wu, T. Xiong, F. Xiong, Z. Liu, Q. An and L. Mai. *ACS Appl. Mater. Interfaces*, 2018, **10**, 36988–36995.
3. Y. Luo, J. Han, Q. Ma, R. Zhan, Y. Zhang, Q. Xu and M. Xu, *ChemistrySelect*, 2018, **3**, 9807–9811.
4. B. Xu, X. Ma, J. Tian, F. Zhao, Y. Liu, B. Wang, H. Yang and Y. Xia, *Ionics*, 2019, **25**, 4171–4177.
5. Y. Subramanian, G. K. Veerasubramani, M. S. Park and D. W. Kim, *J. Electrochem. Soc.*, 2019, **166**, A598-A604.
6. M. Chen, L. Wang, X. Sheng, T. Wang, J. Zhou, S. Li, X. Shen, M. Zhang, Q. Zhang, X. Yu, J. Zhu and B. Lu, *Adv. Funct. Mater.*, 2020, **30**, 2004247.

7. Q. H. Nguyen, H. Kim, T. Kim, W. Choi, J. Hur, *Chem. Eng. J.*, 2020, **382**, 122981.
8. X. Wu, B. Wu, H. Wang, Q. Zhuang, Z. Xiong, H. Yi, P. Xu, G. Shi, Y. Guo and B. Wang, *Energy Fuels*, 2021, **35**, 11563–11571.
9. Q. Peng, F. Ling, H. Yang, P. Duan, R. Xu, Q. Wang and Y. Yu, *Energy Storage Mater.* 2021, **39**, 265–270.
10. L. F. Zhou, X. W. Gao, T. Du, H. Gong, L. Y. Liu and W. B. Luo, *Chem. Eng. J.*, 2022, **435**, 134838.
